# Supplementary material for: Opposing Effects of Reduced Kidney Mass on Liver and Skeletal Muscle Insulin Sensitivity in Obese Mice
Source: Oxford University Press journal article supplement (doi:10.2337/db14-0779), 2014-10-16

SUPPLEMENTARY DATA

**Supplementary Figure 1.**

Similar respiratory quotient, locomotor activity and food intake in HFD-fed sham-operated and UniNx mice

(A and B) Respiratory quotient (RQ) and activity was determined in metabolic cages in HFD-fed sham-operated (black symbols) and UniNx (grey symbols) mice. (C) Food intake was measured in metabolic cages in HFD-fed sham-operated (black bars) and UniNx (grey bars) mice. n=7-8. Error bars represent SEM.

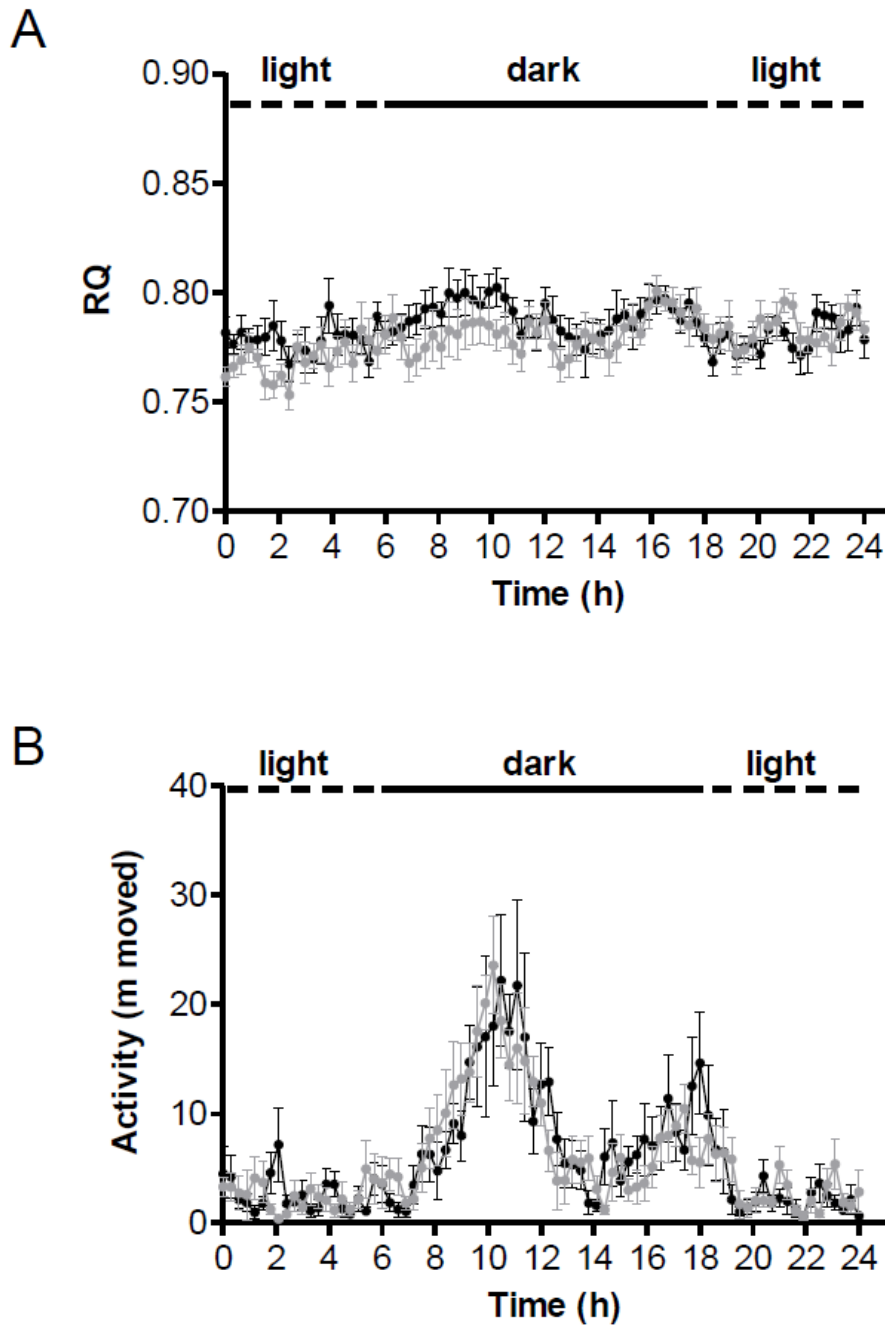

SUPPLEMENTARY DATA

C

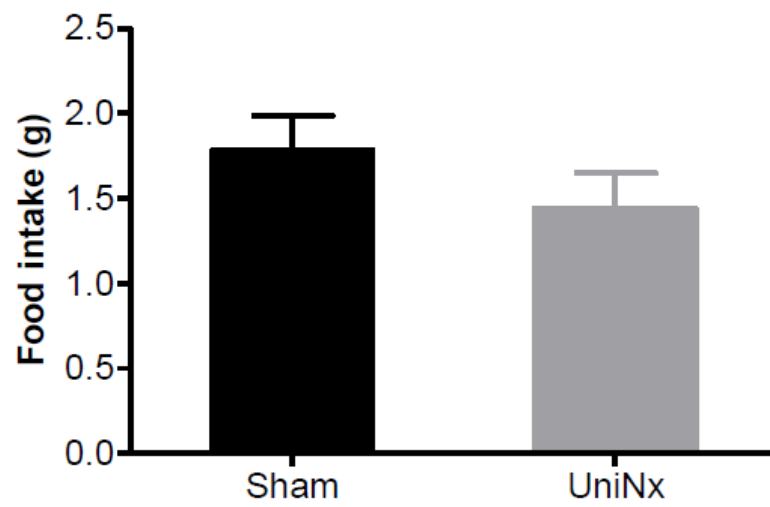

SUPPLEMENTARY DATA

**Supplementary Figure 2.**

Blood glucose concentrations and glucose infusion rates during hyperinsulinemic-euglycemic clamp

(A) Blood glucose levels were clamped upon insulin infusion at about 5 mmol/l in HFD-fed sham (black symbols) and UniNx (grey symbols) mice. n=5. (B) In order to maintain euglycemia, glucose infusion rate was adjusted over time. n=5.

**A**

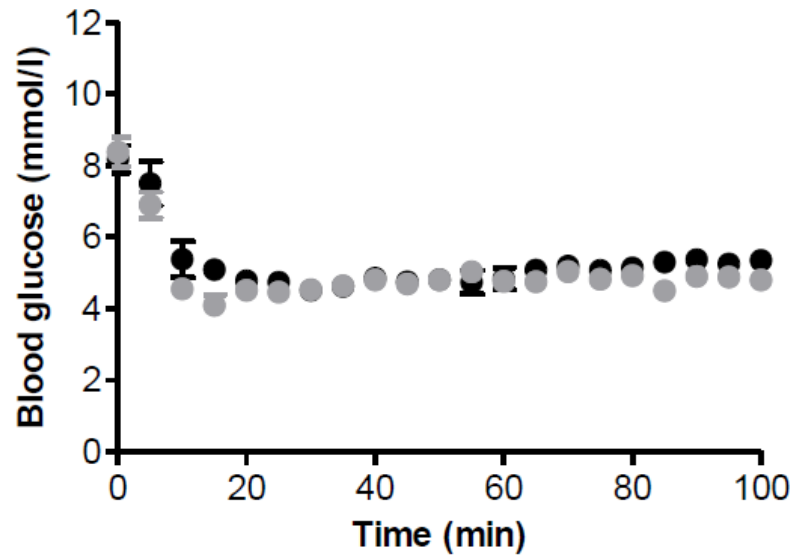

**B**

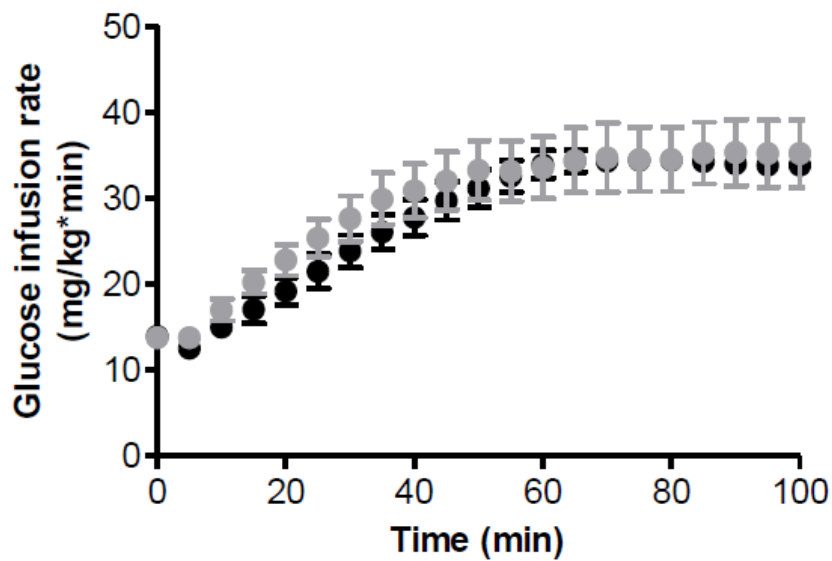

SUPPLEMENTARY DATA

**Supplementary Figure 3.**

Similar CD31 and HIF1 $\alpha$  mRNA expression in chow-fed sham-operated and UniNx mice  
mRNA expression of CD31 and HIF1 $\alpha$  in quadriceps muscle of chow-fed sham-operated (black bars) and UniNx mice (grey bars). n=5.

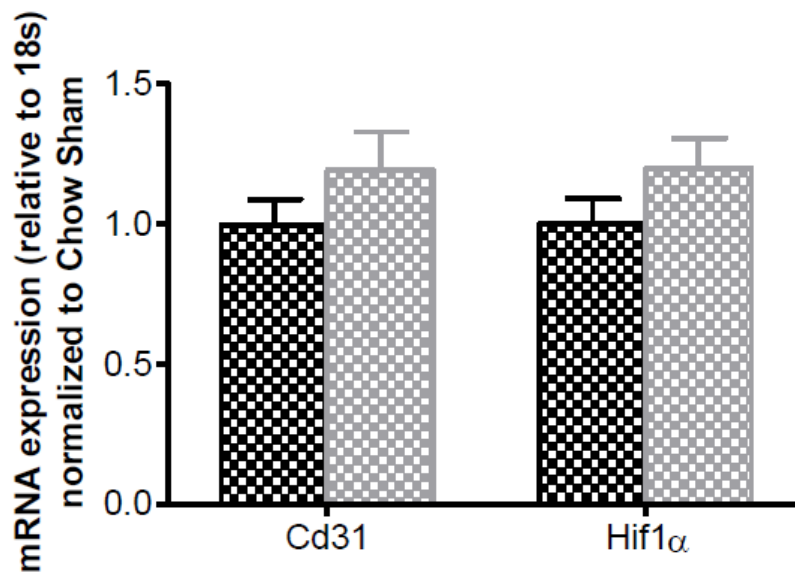

SUPPLEMENTARY DATA

**Supplementary Figure 4.**

Blood glucose concentrations and glucose infusion rates during hyperinsulinemic-euglycemic clamp in telmisartan-treated HFD-fed mice

(A) Blood glucose levels were clamped upon insulin infusion at about 5 mmol/l in telmisartan-treated HFD-fed sham (black circles) and UniNx (grey circles) mice. n=5.

(B) In order to maintain euglycemia, glucose infusion rate was adjusted over time. n=5.

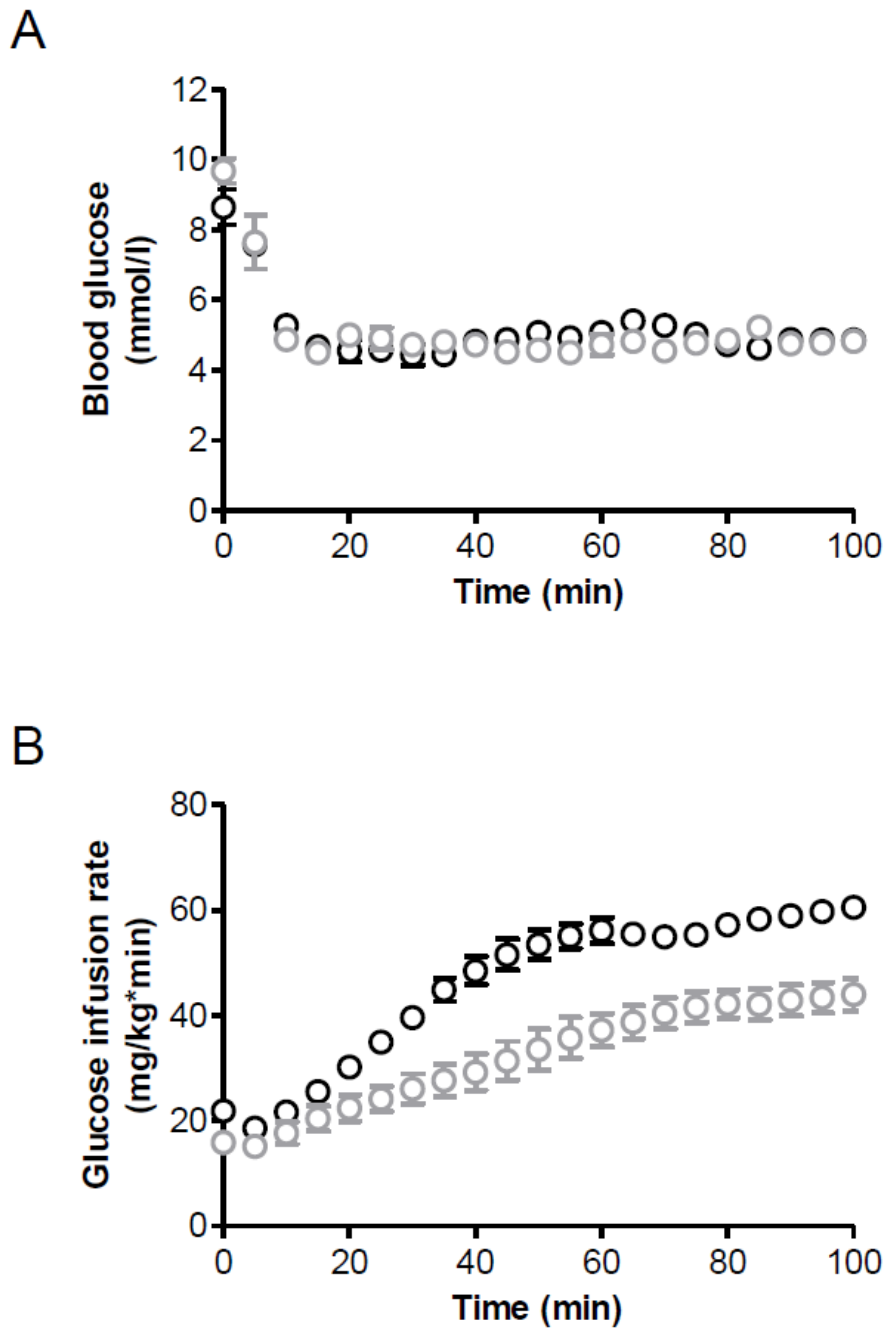

Supplement: db140779supplementarydata.pdf [file db140779supplementarydata.pdf]
